# Supplementary material for: A Cost-Effective Pichia pastoris Cell-Free System Driven by Glycolytic Intermediates Enables the Production of Complex Eukaryotic Proteins
Source: MDPI journal article supplement (doi:10.3390/bioengineering11010092), 2024-01-18
Supplement: s1 [file s1]

## Supplementary Materials

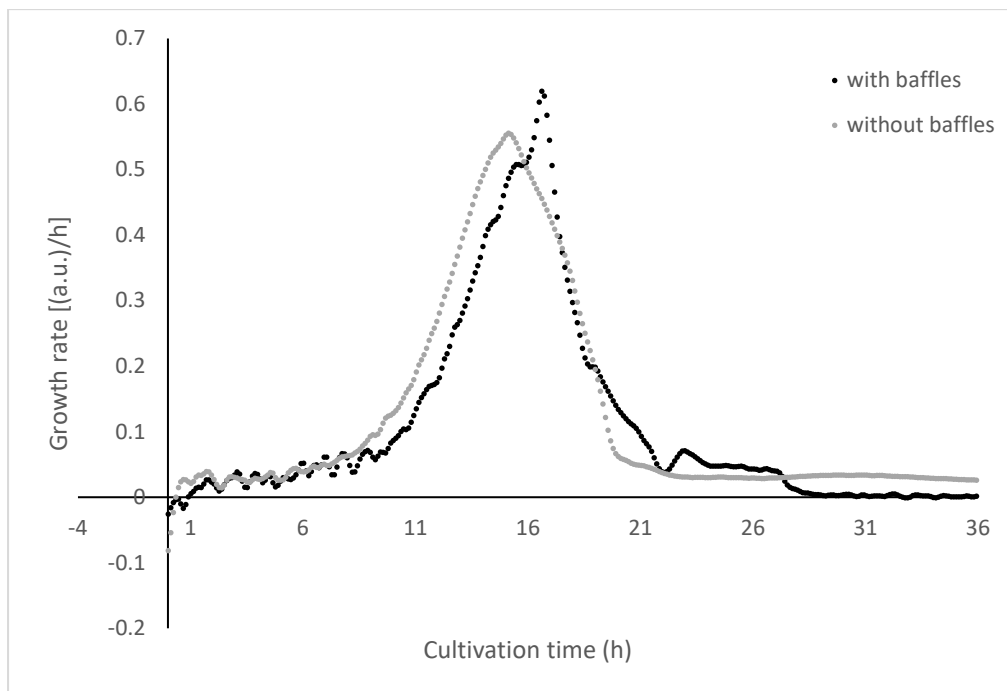

**Supplementary Figure S1: Growth rate of *P. pastoris*.** *P. pastoris* was cultivated in shake flasks with (black dots) and without baffles (grey dots). Cell growth was monitored over time and growth rates were calculated using an online biomass sensor.

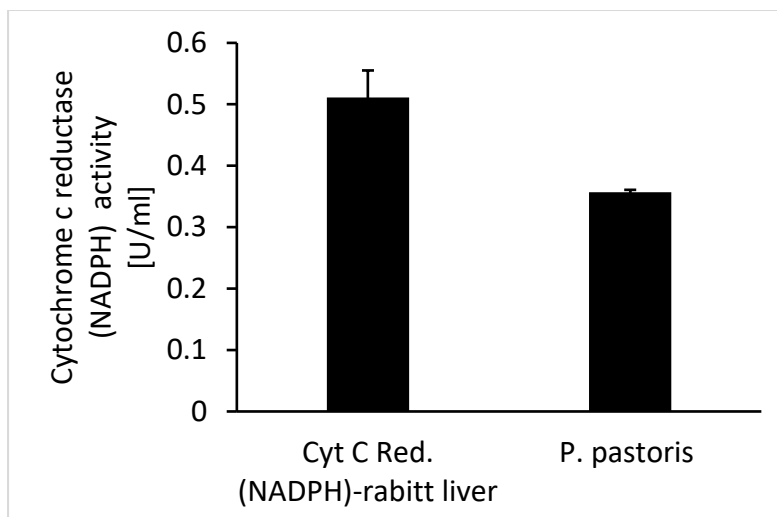

**Supplementary Figure S2: Cytochrome c Reductase (NADPH) assay.** *P. pastoris* cell lysate was prepared and the Cytochrome c Reductase (NADPH) activity was determined using the Cytochrome c Reductase (NADPH) assay (Sigma-Aldrich) according to the manufacturer's instruction. A positive control containing Cytochrome c Reductase (NADPH) from rabbit liver was additionally analyzed. Measurements were performed in technical duplicate. Data are shown as mean  $\pm$  SD.

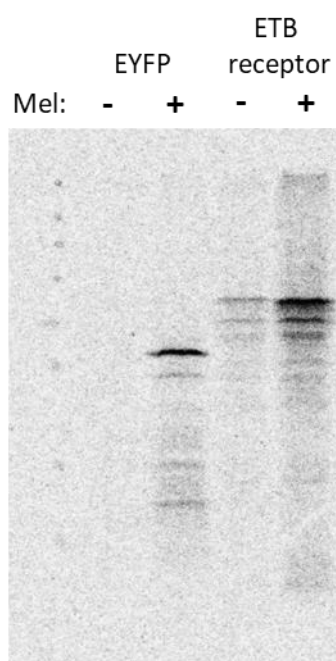

**Supplementary Figure S3: Cell-free protein synthesis with and without melittin signal peptide.** EYFP and the ETB receptor were synthesized in *P. pastoris* cell-free reactions in the presence of  $^{14}\text{C}$  leucine. A melittin signal peptide (Mel) was inserted (+) or was omitted (-) in utilized templates. Proteins in the translation mixture were precipitated by acetone after cell-free protein synthesis. The autoradiography of radiolabelled proteins is visualized.

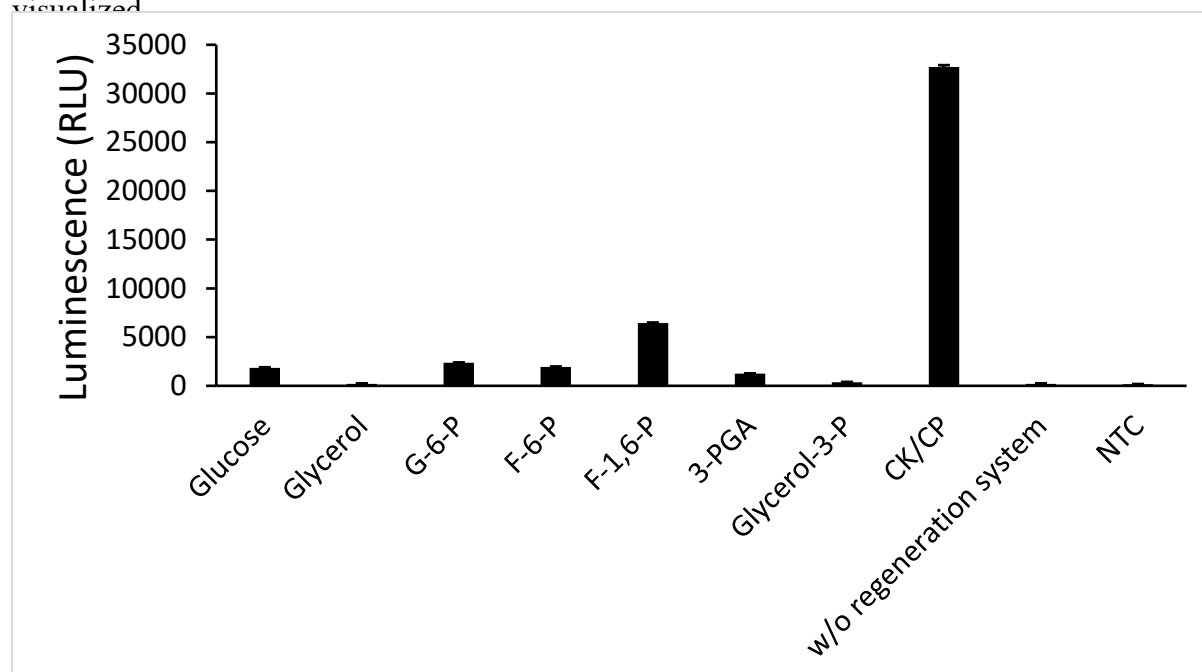

**Supplementary Figure S4: Cell-free protein synthesis based on different energy sources.** Nanoluciferase (Promega) was synthesized in cell-free reactions based on *P. pastoris* cell lysate, which was processed by size exclusion chromatography. Luminescence was analyzed.

after cell-free protein synthesis by the Nano-Glo Luciferase Assay System (Promega). Measurements were performed in technical duplicate. Data are shown as mean  $\pm$  SD.

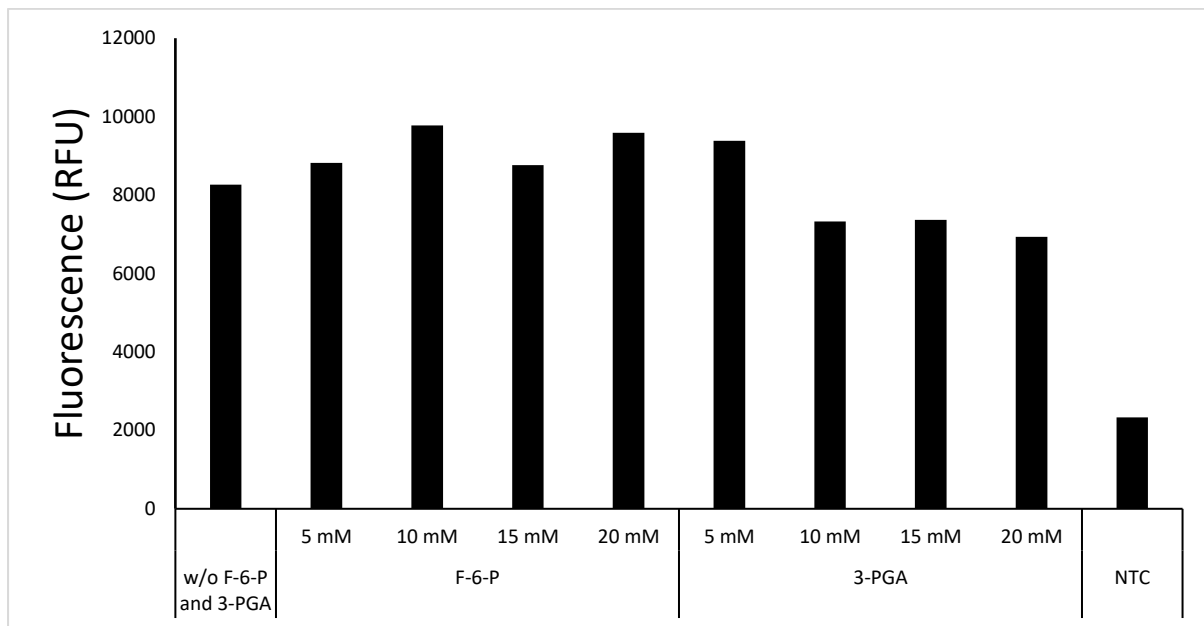

**Supplementary Figure S5: Cell-free protein synthesis containing F-1,6-P.** Cell-free synthesis of ppa-GFP based on *P. pastoris* cell lysate was performed in the presence of 20 mM F-1,6-P. Different concentrations of F-6-P and 3-PGA were applied during cell-free reactions. Fluorescence was detected after cell-free protein synthesis. Results are displayed as endpoint measurement.

$$\text{Response (RFU)} = 4480 + 95 \text{ KPO4} - 12 \text{ cAMP} - 693 \text{ NAD} + 17 \text{ KPO4} * \text{cAMP} - 64 \text{ KPO4} * \text{NAD} + 27 \text{ cAMP} * \text{NAD} - 4 \text{ KPO4} * \text{cAMP} * \text{NAD}$$

**Supplementary Figure S6: Model equation of the full-factorial design.** The model equation corresponds to Supplementary Table 1 and Figure 5 and is shown in uncoded units.

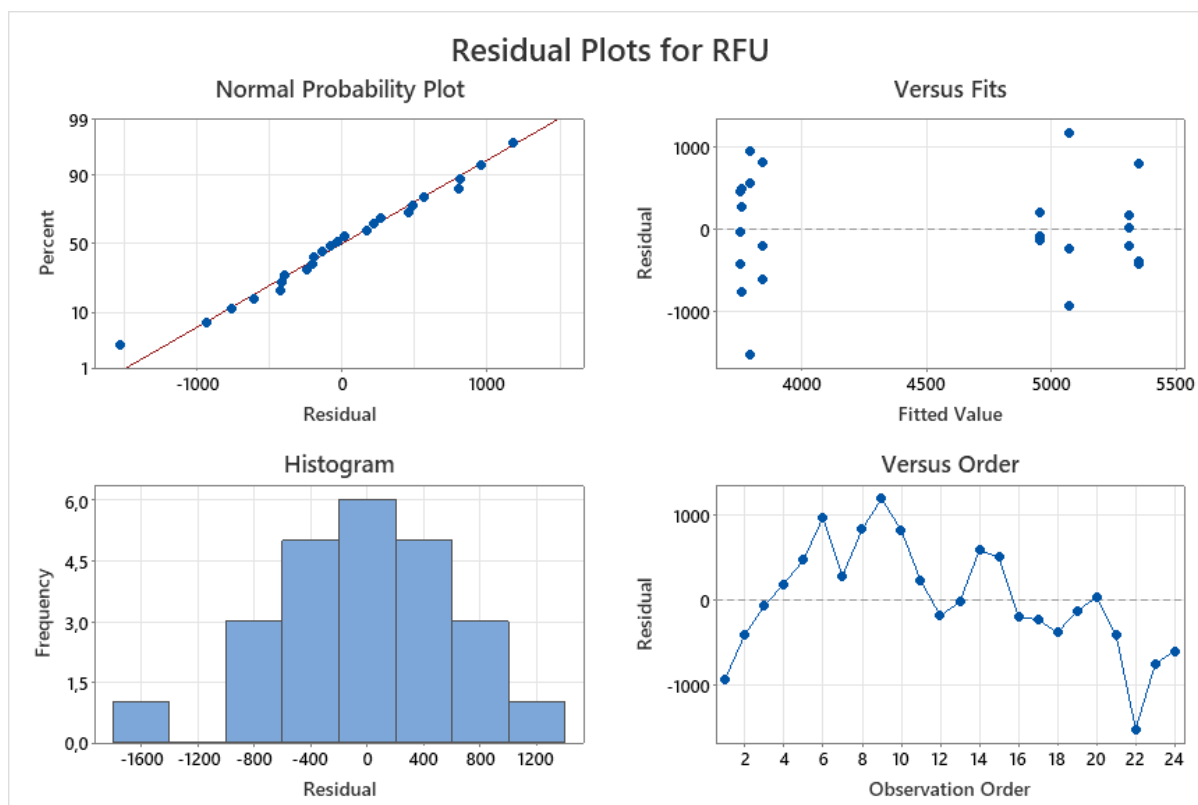

**Supplementary Figure S7: Residual plots of the full-factorial design.** The influence of NAD, cAMP and KPO<sub>4</sub> were analyzed based on a full-factorial design. Corresponding model information, analysis of variance and plots can be found in Supplementary Table 1 and Figure 5, respectively. Residual plots are shown and were prepared using Minitab software.

Response (RFU) = 5783 + 53.6 KOAc + 569 Mg(OAc)<sub>2</sub> – 36.2 HEPES + 7.23 Amino acids – 5.01 NTPs w/o ATP – 386.2 F-1,6-P – 0.4263 KOAc\*KOAc – 114.1 Mg(OAc)<sub>2</sub>\*Mg(OAc)<sub>2</sub> – 0.00386 NTPs w/o ATP\*NTPs w/o ATP + 0.0667 KOAc\*NTPs w/o ATP + 28.68 Mg(OAc)<sub>2</sub>\*F-1,6-P + 4.34 HEPES\*F-1,6-P + 0.4285 NTPs w/o ATP\*F-1,6-P

**Supplementary Figure S8: Model equation of the central composite design.** The model equation corresponds to Table 1 and is shown in uncoded units.

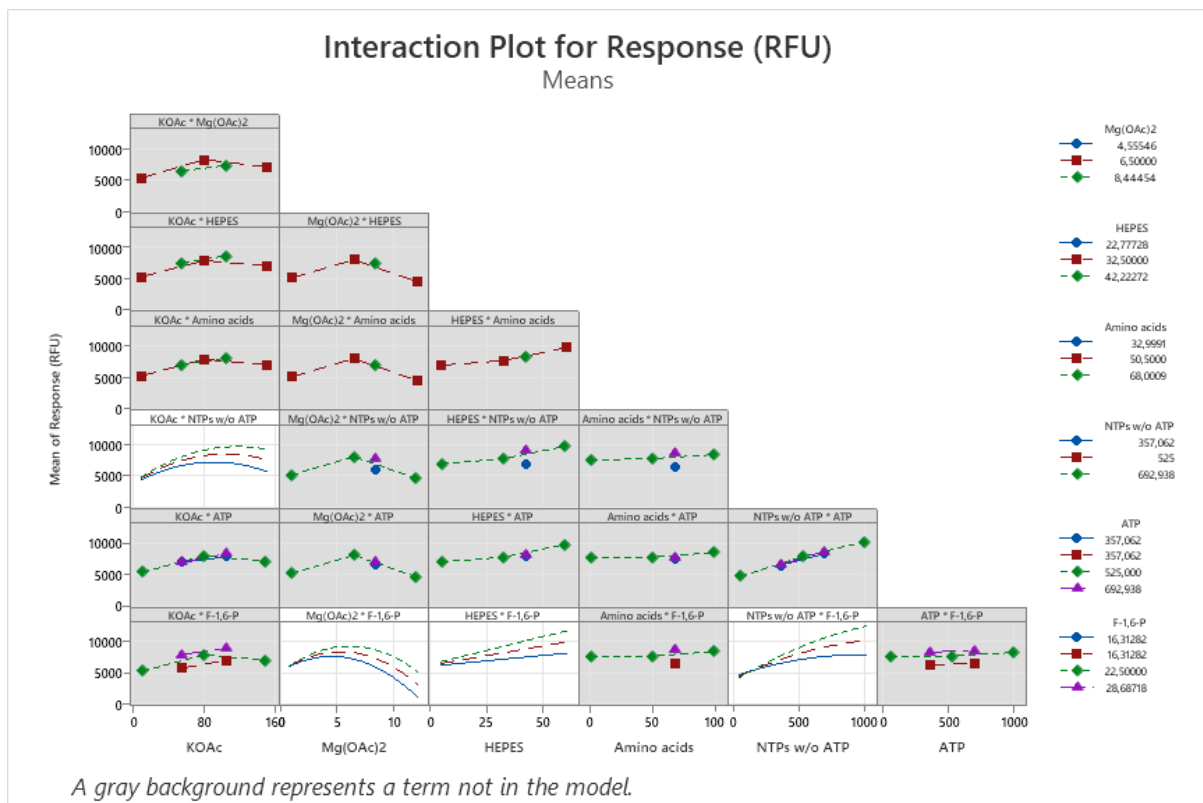

**Supplementary Figure S9: Interaction plots of the central composite design.** Interaction plots of the central composite design corresponding to Table 1 are shown and were prepared using Minitab software.

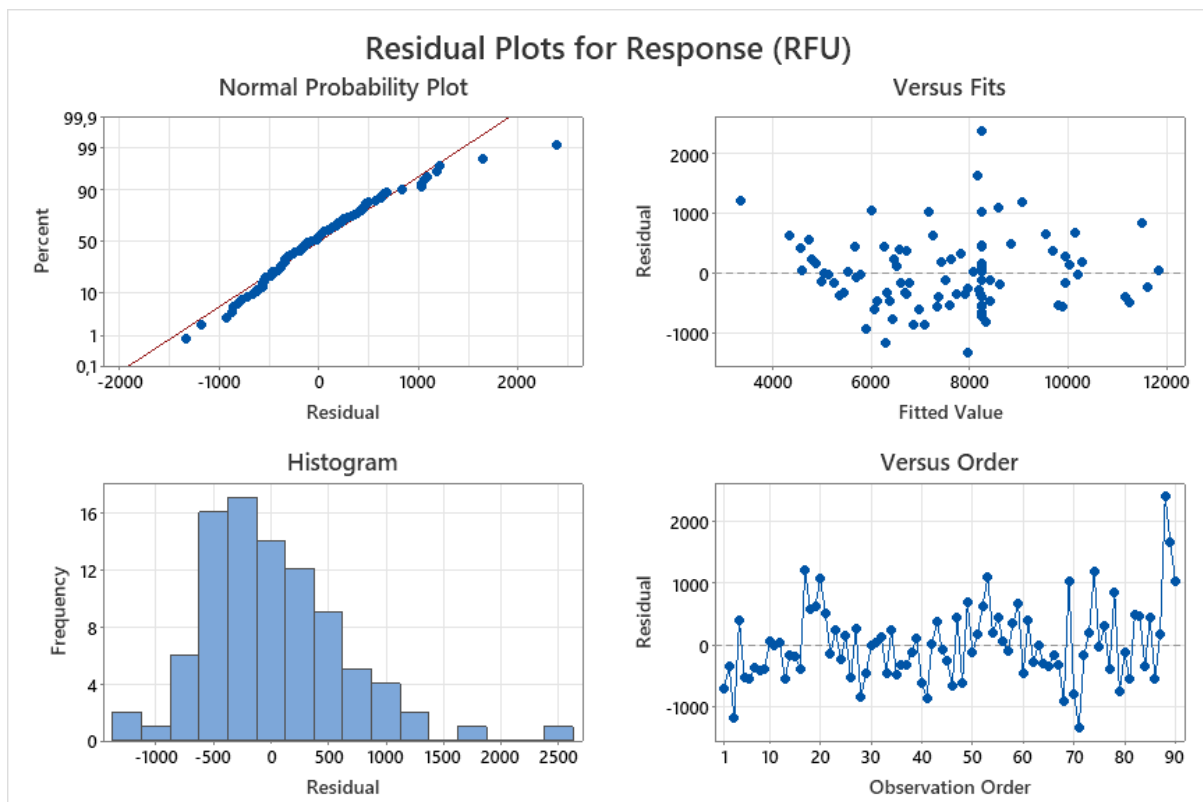

**Supplementary Figure S10: Residual plots of the central composite design.** Residual plots corresponding to Table 1 are shown and were prepared using Minitab software.

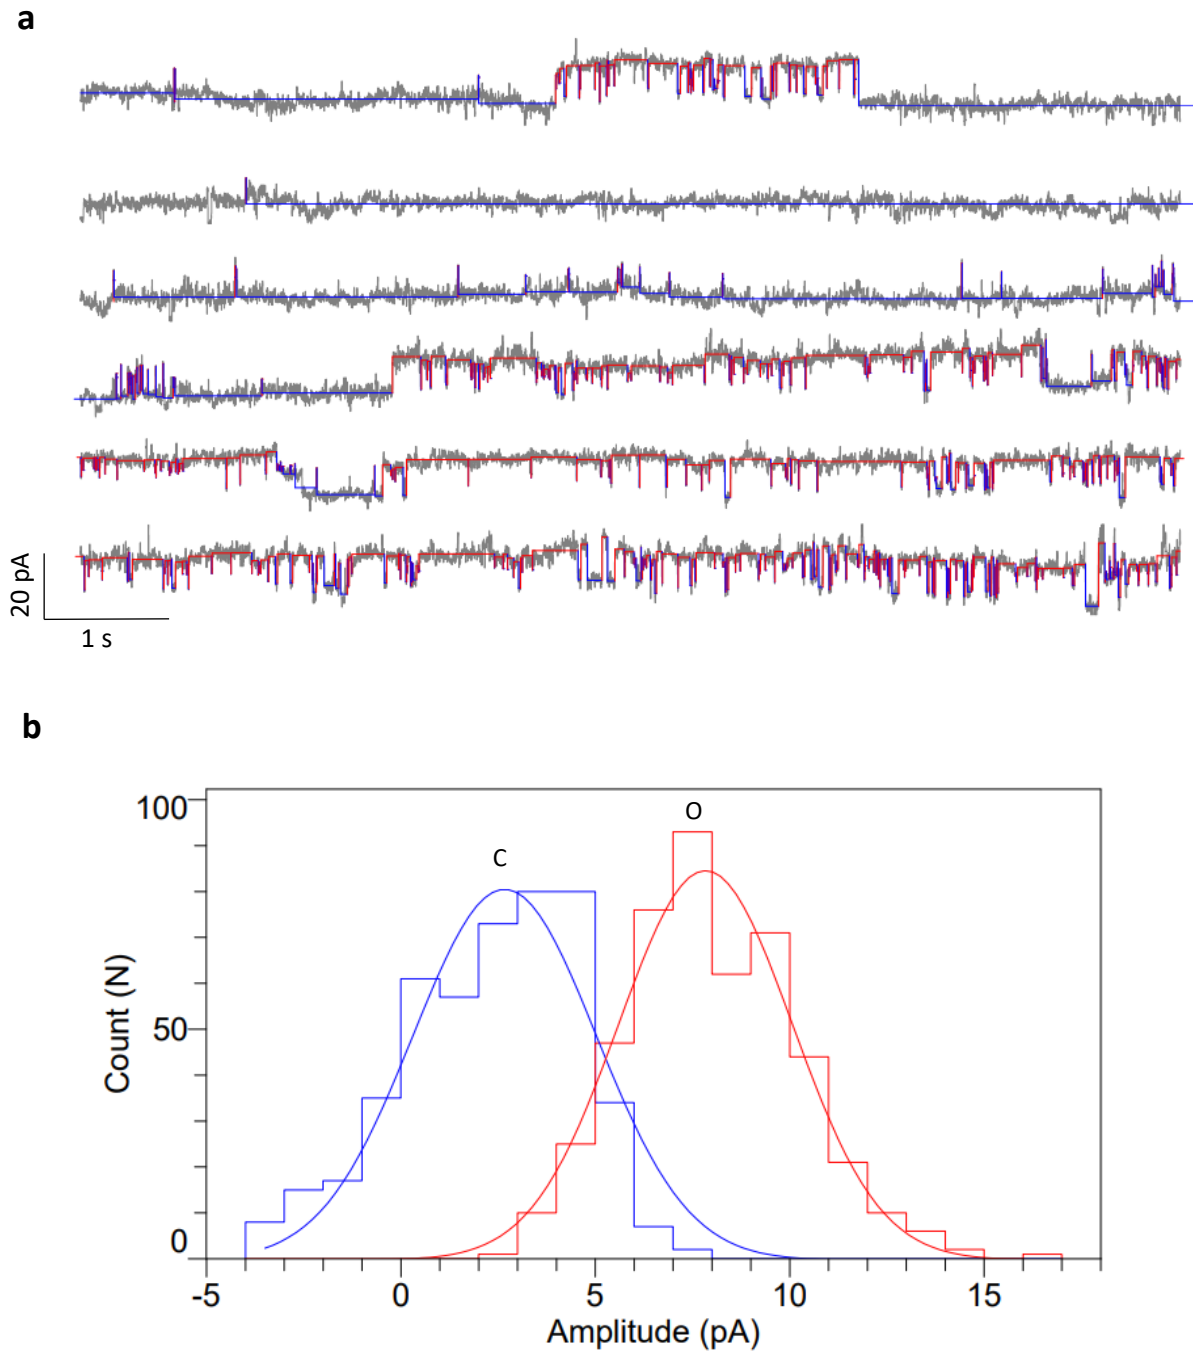

**Supplementary Figure S11.** Planar lipid bilayer electrophysiology measurements from the DPhPC bilayers after the addition of KcsA containing vesicles. A) Representative current traces of single channel activity of KcsA in pure DPhPC bilayers at pH 4.0 ( $N > 5$ ) at -100 mV. B) All time amplitude histograms of traces of the above single channel trace showing multi-

conductance peaks (C: closed, and C : full open conductance). Buffer: 10mM HEPES, 150mM KCl, pH 4.0.

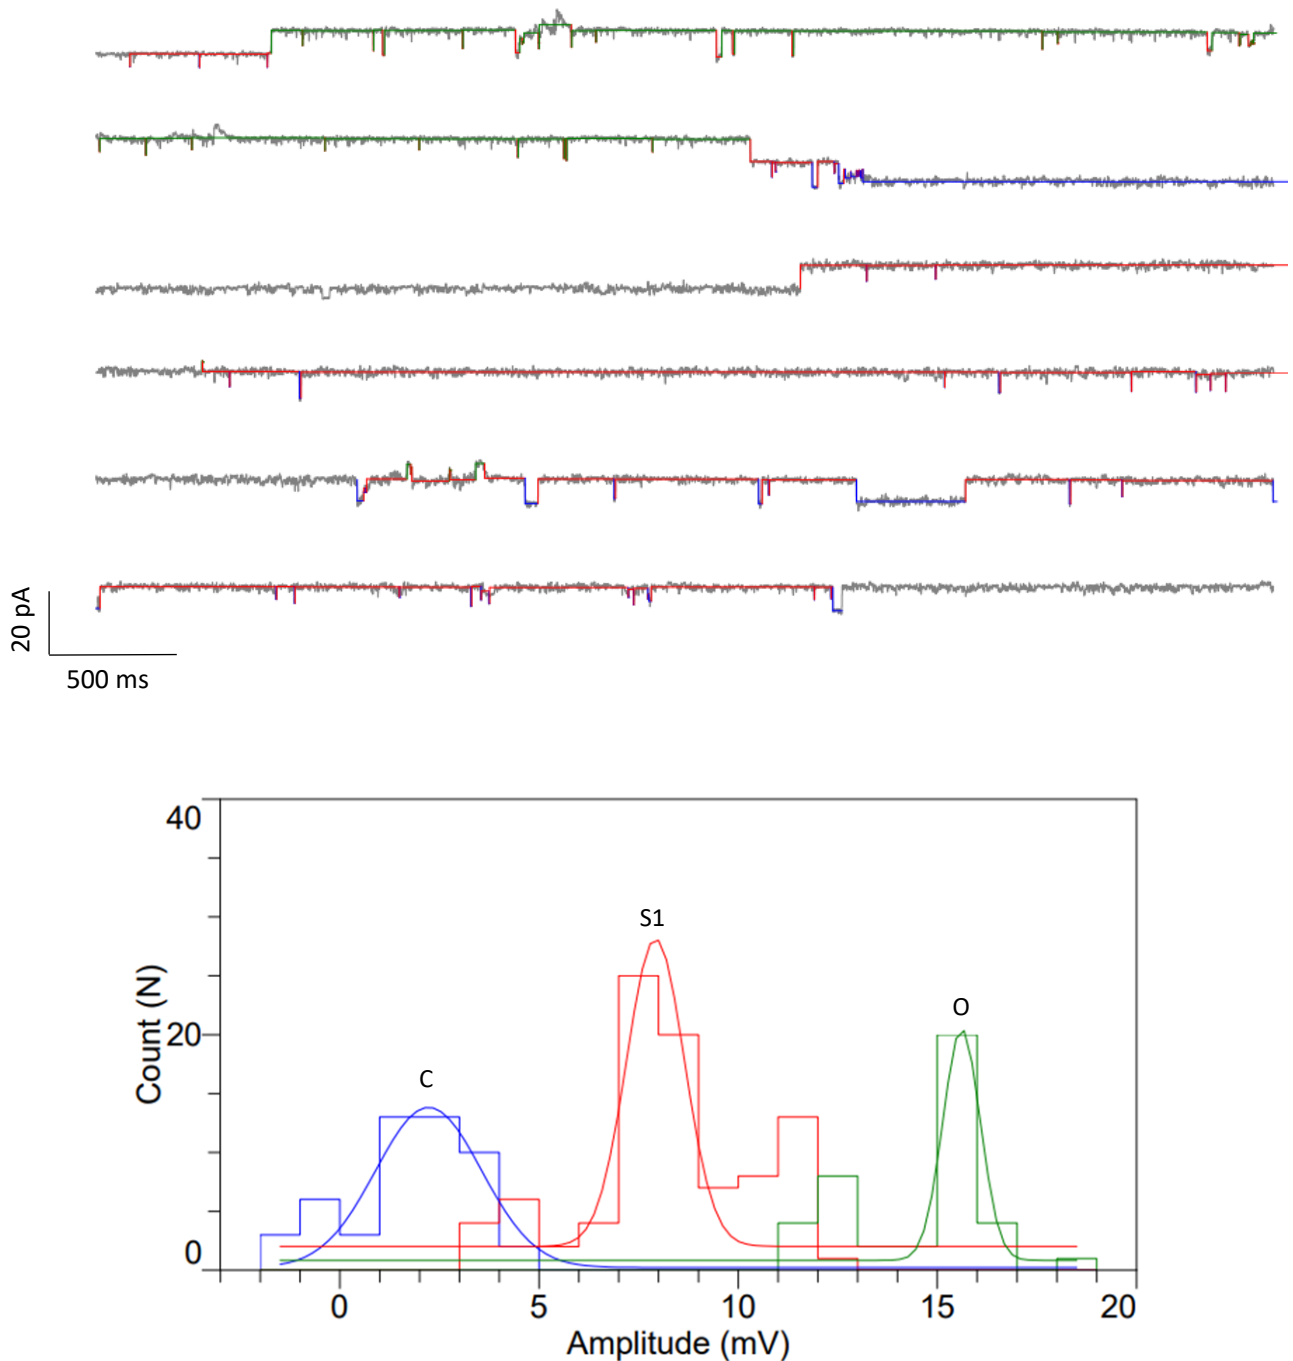

**Supplementary Figure S12.** Planar lipid bilayer electrophysiology measurements from the DPhPC bilayers after the addition of KvAP containing vesicles. A) Representative current traces of single channel activity of KvAP in pure DPhPC bilayers at pH 7.45 ( $N > 5$ ) at +60 mV. B) All time amplitude histograms of traces of the above single channel trace showing multi-conductance peaks (C: closed, S1: sub-conductance 1 and C : full open conductance). Buffer: 10mM HEPES, 150mM KCl, pH 7.45.

**Supplementary Table S1: Model summary and analysis of variance of the full-factorial design.**

| <b>S</b> | <b>R<sup>2</sup></b> | <b>R<sup>2</sup>-adj</b> | <b>R<sup>2</sup>-pred</b> |  |  |
|----------|----------------------|--------------------------|---------------------------|--|--|
| 764.548  | 55.90%               | 36.61%                   | 0.77%                     |  |  |

  

| <b>Source</b>      | <b>DF</b> | <b>Adj SS</b> | <b>Adj MS</b> | <b>F-Value</b> | <b>P-Value</b> |
|--------------------|-----------|---------------|---------------|----------------|----------------|
| Model              | 7         | 11854617      | 1693517       | 2,90           | 0,037          |
| Linear             | 3         | 11733296      | 3911099       | 6,69           | 0,004          |
| KPO4               | 1         | 217313        | 217313        | 0,37           | 0,551          |
| cAMP               | 1         | 3433          | 3433          | 0,01           | 0,940          |
| NAD                | 1         | 11512550      | 11512550      | 19,70          | 0,000          |
| 2-Way Interactions | 3         | 120912        | 40304         | 0,07           | 0,976          |
| KPO4*cAMP          | 1         | 6575          | 6575          | 0,01           | 0,917          |
| KPO4*NAD           | 1         | 97080         | 97080         | 0,17           | 0,689          |
| cAMP*NAD           | 1         | 17258         | 17258         | 0,03           | 0,866          |
| 3-Way Interactions | 1         | 409           | 409           | 0,00           | 0,979          |
| KPO4*cAMP*NAD      | 1         | 409           | 409           | 0,00           | 0,979          |
| Error              | 16        | 9352537       | 584534        |                |                |
| Total              | 23        | 21207154      |               |                |                |



**Supplementary Table S2: Model summary and analysis of variance of the central composite design corresponding to table 1.**

| S      | R <sup>2</sup> | R <sup>2</sup> -adj | PRESS    | R <sup>2</sup> -pred | AICc    | BIC     |  |
|--------|----------------|---------------------|----------|----------------------|---------|---------|--|
| 667.62 | 89.68<br>%     | 87.92%              | 55025830 | 83.24%               | 1447.35 | 1478.36 |  |

  

| Source                                     | DF | Seq SS    | Contribution | Adj SS    | Adj MS   | F-Value | P-Value |
|--------------------------------------------|----|-----------|--------------|-----------|----------|---------|---------|
| Model                                      | 13 | 294419365 | 89.68%       | 294419365 | 22647643 | 50.81   | 0.000   |
| Linear                                     | 6  | 235352852 | 71.69%       | 235352852 | 39225475 | 88.00   | 0.000   |
| KOAc                                       | 1  | 20355056  | 6.20%        | 20355056  | 20355056 | 45.67   | 0.000   |
| Mg(OAc) <sub>2</sub>                       | 1  | 21780696  | 6.63%        | 21780696  | 21780696 | 48.87   | 0.000   |
| HEPES                                      | 1  | 28466325  | 8.67%        | 28466325  | 28466325 | 63.87   | 0.000   |
| Amino acids                                | 1  | 1279414   | 0.39%        | 1279414   | 1279414  | 2.87    | 0.094   |
| NTPs w/o ATP                               | 1  | 78940714  | 24.05%       | 78940714  | 78940714 | 177.11  | 0.000   |
| F-1,6-P                                    | 1  | 84530647  | 25.75%       | 84530647  | 84530647 | 189.65  | 0.000   |
| Square                                     | 3  | 29484887  | 8.98%        | 29484887  | 9828296  | 22.05   | 0.000   |
| KOAc*KOAc                                  | 1  | 6359531   | 1.94%        | 8182454   | 8182454  | 18.36   | 0.000   |
| Mg(OAc) <sub>2</sub> *Mg(OAc) <sub>2</sub> | 1  | 21706273  | 6.61%        | 22319426  | 22319426 | 50.07   | 0.000   |
| NTPs w/o ATP*NTPs w/o ATP                  | 1  | 1419083   | 0.43%        | 1419083   | 1419083  | 3.18    | 0.078   |
| 2-Way Interaction                          | 4  | 29581625  | 9.01%        | 29581625  | 7395406  | 16.59   | 0.000   |
| KOAc*NTPs w/o ATP                          | 1  | 4914213   | 1.50%        | 4914213   | 4914213  | 11.03   | 0.001   |
| Mg(OAc) <sub>2</sub> *F-1,6-P              | 1  | 7620995   | 2.32%        | 7620995   | 7620995  | 17.10   | 0.000   |
| HEPES*F-1,6-P                              | 1  | 4356863   | 1.33%        | 4356863   | 4356863  | 9.77    | 0.003   |
| NTPs w/o ATP*F-1,6-P                       | 1  | 12689554  | 3.87%        | 12689554  | 12689554 | 28.47   | 0.000   |
| Error                                      | 76 | 33874843  | 10.32%       | 33874843  | 445722   |         |         |
| Lack-of-Fit                                | 67 | 30952666  | 9.43%        | 30952666  | 461980   | 1.42    | 0.296   |
| Pure Error                                 | 9  | 2922177   | 0.89%        | 2922177   | 324686   |         |         |
| Total                                      | 89 | 328294207 | 100.00%      |           |          |         |         |
